# Supplementary material for: Use of Local Antibiogram Data and Antimicrobial Importance Ratings to Select Optimal Empirical Therapies for Urinary Tract Infections in Dogs and Cats
Source: MDPI journal article supplement (doi:10.3390/antibiotics9120924), 2020-12-18
Supplement: s1 [file s1]

**Table S1:** Urine sample source by animal species, age and sex

|                                       | <b>Dogs</b>   |             |                |                                    | <b>Cats</b>   |             |                |                                    |                                          |
|---------------------------------------|---------------|-------------|----------------|------------------------------------|---------------|-------------|----------------|------------------------------------|------------------------------------------|
| <b>Age</b><br>(whole years completed) | <b>Female</b> | <b>Male</b> | <b>NR*</b>     | <b>Total</b><br>(% of dog samples) | <b>Female</b> | <b>Male</b> | <b>NR*</b>     | <b>Total</b><br>(% of cat samples) | <b>Grand Total</b><br>(% of all samples) |
| <b>0</b>                              | 188           | 33          | 1              | 222 (5.9)                          | 11            | 14          | 0              | 25 (1.3)                           | 247 (4.4)                                |
| <b>1-3</b>                            | 289           | 90          | 10             | 389 (10)                           | 87            | 90          | 3              | 180 (10)                           | 569 (10)                                 |
| <b>4-6</b>                            | 347           | 124         | 5              | 476 (13)                           | 104           | 82          | 1              | 187 (10)                           | 663 (12)                                 |
| <b>7-9</b>                            | 622           | 235         | 4              | 861 (23)                           | 121           | 77          | 4              | 202 (11)                           | 1063 (57)                                |
| <b>10-12</b>                          | 736           | 291         | 5              | 1032 (27)                          | 197           | 100         | 2              | 299 (16)                           | 1331 (24)                                |
| <b>13-15</b>                          | 521           | 164         | 1              | 686 (18)                           | 344           | 99          | 3              | 446 (24)                           | 1132 (20)                                |
| <b>16+</b>                            | 71            | 26          | 1              | 98 (2.6)                           | 434           | 77          | 0              | 511 (28)                           | 609 (11)                                 |
| <b>Total</b>                          | 2774          | 963         | 27             |                                    | 1298          | 539         | 13             |                                    |                                          |
| <b>(% from that species)</b>          | <b>(74)</b>   | <b>(26)</b> | <b>(&lt;1)</b> | 3764                               | <b>(70)</b>   | <b>(29)</b> | <b>(&lt;1)</b> | 1850                               | 5614                                     |

\*NR = not recorded. Female and male categories include both entire and desexed animals

**Table S2:** Multiple resistance patterns in *E. coli*

|              | <b>Resistance combinations detected</b>                   | <b>n</b>   | <b>Proportion</b> | <b>Comments</b>                             |
|--------------|-----------------------------------------------------------|------------|-------------------|---------------------------------------------|
| <b>Two</b>   | AMX + SXT                                                 | 75         | 2.3%              | <b>Most frequent combination</b>            |
|              | AMX + FQN                                                 | 30         | 0.9%              |                                             |
|              | AMX + LEX                                                 | 16         | 0.5%              |                                             |
|              | <b>AMX + LEX + CVN</b>                                    | <b>122</b> | <b>3.7%</b>       |                                             |
| <b>Three</b> | AMX + FQN + SXT                                           | 24         | 0.7%              |                                             |
| <b>Four</b>  | AMX + AMC + LEX + CVN                                     | 63         | 1.9%              | <b>Broadest resistance pattern detected</b> |
|              | AMX + LEX + CVN + SXT                                     | 22         | 0.7%              |                                             |
|              | AMX + LEX + CVN + FQN                                     | 11         | 0.3%              |                                             |
| <b>Five</b>  | AMX + LEX + CVN + FQN + SXT                               | 24         | 0.7%              |                                             |
|              | AMX + AMC + LEX + CVN + SXT                               | 8          | 0.2%              |                                             |
| <b>Six</b>   | AMX + LEX + CVN + TET + FQN                               | 5          | 0.2%              |                                             |
| <b>Ten</b>   | AMX + AMC + LEX + CVN + CLI + TET + FQN + GEN + TIC + SXT | 1          | 0.03%             |                                             |

Only combinations detected in  $\geq 0.2\%$  of all isolates, or representative of the broadest resistance pattern for this bacterial species are listed. AMX = amoxicillin (tested using ampicillin); AMC = amoxicillin-clavulanate; CLI = clindamycin; CVN = ceftiofur ; TET = tetracyclines (doxycycline, tetracycline); FQN = any fluoroquinolone (enrofloxacin, marbofloxacin, ciprofloxacin); GEN = gentamicin; LEX = cephalexin; SXT = trimethoprim-sulfamethoxazole; TIC = ticarcillin.

**Table S3:** Multiple resistance patterns in *Enterococcus faecalis*

|              | Resistance combinations detected | n         | Proportion  | Comments                                     |
|--------------|----------------------------------|-----------|-------------|----------------------------------------------|
| <b>Two</b>   | <b>FQN + TET</b>                 | <b>43</b> | <b>6.8%</b> | <b>Most frequent combination</b>             |
|              | FQN + ERY                        | 24        | 3.8%        |                                              |
|              | FQN + CLI                        | 9         | 1.4%        |                                              |
|              | FQN + GEN                        | 6         | 0.9%        |                                              |
|              | FQN + AMX                        | 2         | 0.3%        |                                              |
|              | FQN + AMC                        | 1         | 0.2%        |                                              |
|              | TET + ERY                        | 1         | 0.2%        |                                              |
| <b>Three</b> | FQN + AMX + AMC                  | 11        | 1.7%        | <b>Broadest resistance patterns detected</b> |
|              | FQN + TET + GEN                  | 8         | 1.3%        |                                              |
|              | FQN + CLI + ERY                  | 4         | 0.6%        |                                              |
|              | FQN + TET + GEN                  | 2         | 0.3%        |                                              |
| <b>Four</b>  | FQN + AMX + AMC + TET            | 1         | 0.2%        |                                              |
|              | FQN + AMX + TET + GEN            | 1         | 0.2%        |                                              |
|              | FQN + AMX + AMC + ERY            | 1         | 0.2%        |                                              |
| <b>Five</b>  | FQN + AMX + AMC + TET + ERY      | 3         | 0.5%        |                                              |
|              | FQN + AMX + AMC + TET + GEN      | 2         | 0.3%        |                                              |
|              | FQN + AMX + AMC + ERY + GEN      | 1         | 0.2%        |                                              |

Only combinations detected in  $\geq 0.2\%$  of all isolates, or representative of the broadest resistance pattern for this bacterial species are listed. AMX = amoxicillin (tested using ampicillin); AMC = amoxicillin-clavulanate; TET = tetracyclines (doxycycline, tetracycline); ERY = erythromycin; FQN = any fluoroquinolone (enrofloxacin, marbofloxacin, ciprofloxacin); GEN = gentamicin.

**Table S4:** Multiple resistance patterns in *Staphylococcus pseudintermedius*

|              | Resistance combinations detected              | n  | Proportion | Comments                                    |
|--------------|-----------------------------------------------|----|------------|---------------------------------------------|
| <b>Two</b>   | FQN + SXT                                     | 3  | 0.6%       | <b>Most frequent combination</b>            |
|              | TET + ERY                                     | 3  | 0.6%       |                                             |
|              | AMX + SXT                                     | 1  | 0.2%       |                                             |
| <b>Three</b> | AMX + LEX + CVN                               | 13 | 2.5%       |                                             |
|              | TET + ERY + SXT                               | 3  | 0.6%       |                                             |
|              | TET + FQN + SXT                               | 1  | 0.2%       |                                             |
|              | AMX + LEX + SXT                               | 1  | 0.2%       |                                             |
|              | AMC + LEX + CVN                               | 1  | 0.2%       |                                             |
| <b>Four</b>  | AMX + LEX + CVN + SXT                         | 9  | 1.8%       |                                             |
|              | AMX + AMC + LEX + CVN                         | 3  | 0.6%       |                                             |
|              | TET + FQN + GEN + SXT                         | 1  | 0.2%       |                                             |
| <b>Five</b>  | TET + FQN + ERY + GEN + SXT                   | 2  | 0.4%       | <b>Broadest resistance pattern detected</b> |
|              | AMX + AMC + LEX + CVN + FQN                   | 1  | 0.2%       |                                             |
| <b>Six</b>   | TET + FQN + ERY + GEN + TIC + SXT             | 1  | 0.2%       |                                             |
| <b>Eight</b> | AMX + AMC + LEX + CVN + TET + ERY + GEN + SXT | 1  | 0.2%       |                                             |

Only combinations detected in  $\geq 0.2\%$  of all isolates, or representative of the broadest resistance pattern for this bacterial species are listed. AMX = amoxicillin (tested using ampicillin); AMC = amoxicillin-clavulanate; CVN = cefovecin ; TET = tetracyclines (doxycycline, tetracycline); ERY = erythromycin; FQN = any fluoroquinolone (enrofloxacin, marbofloxacin, ciprofloxacin); GEN = gentamicin; LEX = cephalexin; SXT = trimethoprim-sulfamethoxazole; TIC = ticarcillin.

**Table S5:** Multiple resistance patterns in *Proteus mirabilis*

|              | Resistance combinations detected | n         | Proportion  | Comments                                     |
|--------------|----------------------------------|-----------|-------------|----------------------------------------------|
| <b>Two</b>   | <b>AMX + SXT</b>                 | <b>12</b> | <b>2.7%</b> | <b>Most frequent combination</b>             |
|              | AMX + CVN                        | 1         | 0.2%        |                                              |
|              | AMX + FQN                        | 1         | 0.2%        |                                              |
|              | FQN + SXT                        | 1         | 0.2%        |                                              |
|              | LEX + CVN                        | 1         | 0.2%        |                                              |
| <b>Three</b> | AMX + LEX + CVN                  | 7         | 1.6%        | <b>Broadest resistance patterns detected</b> |
|              | AMX + FQN + SXT                  | 3         | 0.7%        |                                              |
| <b>Four</b>  | AMX + AMC + LEX + CVN            | 3         | 0.7%        |                                              |
|              | AMX + LEX + CVN + SXT            | 2         | 0.5%        |                                              |
|              | AMX + LEX + CVN + GEN            | 1         | 0.2%        |                                              |

Only combinations detected in  $\geq 0.2\%$  of all isolates, or representative of the broadest resistance pattern for this bacterial species are listed. AMX = amoxicillin (tested using ampicillin); AMC = amoxicillin-clavulanate; CVN = cefovecin ; FQN = any fluoroquinolone (enrofloxacin, marbofloxacin, ciprofloxacin); GEN = gentamicin; LEX = cephalexin; SXT = trimethoprim-sulfamethoxazole.
