# Supplementary material for: Use of Local Antibiogram Data and Antimicrobial Importance Ratings to Select Optimal Empirical Therapies for Urinary Tract Infections in Dogs and Cats
Source: MDPI journal article supplement (doi:10.3390/antibiotics9120924), 2020-12-18
Supplement: s1 [file s1]

| Dog Breed                           | Age (whole years completed) |    |    |    |    |    |    |    |    |    |    |    |    |    |    |    |    |    |    | Total |
|-------------------------------------|-----------------------------|----|----|----|----|----|----|----|----|----|----|----|----|----|----|----|----|----|----|-------|
|                                     | 0                           | 1  | 2  | 3  | 4  | 5  | 6  | 7  | 8  | 9  | 10 | 11 | 12 | 13 | 14 | 15 | 16 | 17 | 18 |       |
| Labrador Retriever                  | 21                          | 8  | 8  | 13 | 9  | 3  | 4  | 8  | 19 | 21 | 20 | 38 | 31 | 34 | 32 | 14 | 3  | 1  |    | 287   |
| Pug                                 | 1                           | 7  | 6  | 19 | 16 | 11 | 14 | 18 | 23 | 17 | 21 | 23 | 16 | 7  | 4  | 4  |    | 1  |    | 208   |
| Golden Retriever                    | 23                          | 3  | 14 | 6  | 5  | 6  | 7  | 6  | 7  | 10 | 10 | 22 | 18 | 12 | 18 | 8  | 2  | 1  |    | 178   |
| Border Collie                       | 9                           | 2  | 5  | 2  | 12 | 8  | 6  | 14 | 10 | 23 | 24 | 19 | 11 | 14 | 6  | 4  | 2  | 1  |    | 172   |
| Cavalier King Charles Spaniel       |                             | 1  | 3  | 3  | 5  | 8  | 6  | 7  | 30 | 20 | 17 | 18 | 11 | 9  | 15 | 2  | 1  |    |    | 156   |
| Maltese Cross                       | 1                           |    | 2  | 6  | 3  | 1  | 5  | 11 | 10 | 12 | 23 | 16 | 16 | 12 | 12 | 11 | 3  | 3  | 1  | 148   |
| Poodle Cross                        | 6                           | 1  | 9  |    | 6  | 3  | 2  | 7  | 8  | 11 | 9  | 7  | 12 | 7  | 3  | 3  | 2  | 1  | 1  | 98    |
| Miniature Schnauzer                 | 5                           | 1  | 2  | 7  | 7  | 3  | 6  | 5  | 14 | 6  | 7  | 5  | 10 | 8  | 2  |    |    | 1  |    | 89    |
| Staffordshire Bull Terrier          |                             | 1  | 5  | 3  | 1  | 2  | 3  | 4  | 9  | 5  | 9  | 11 | 10 | 8  | 12 | 2  | 2  |    |    | 87    |
| Cocker Spaniel                      |                             |    | 2  | 3  | 6  | 1  | 1  | 9  | 7  | 9  | 5  | 10 | 11 | 7  | 6  | 3  | 1  | 1  |    | 82    |
| Cavalier King Charles Spaniel Cross | 1                           | 4  | 1  | 1  | 2  | 4  | 7  | 10 | 8  | 9  | 5  | 8  | 2  | 6  | 3  |    | 1  |    |    | 72    |
| Jack Russell Terrier                | 2                           | 1  | 6  | 5  | 1  | 3  | 2  | 1  | 3  | 5  | 4  | 5  | 2  | 11 | 8  | 6  | 3  | 4  |    | 72    |
| Beagle                              | 1                           |    | 1  |    |    | 2  | 1  | 3  | 5  | 3  | 7  | 4  | 14 | 11 | 9  | 2  |    |    |    | 63    |
| Kelpie Cross                        | 2                           | 1  | 1  | 3  | 1  | 2  | 1  | 6  | 3  | 4  | 4  | 7  | 8  | 8  | 6  | 3  | 3  |    |    | 63    |
| French Bulldog                      | 17                          | 10 | 5  | 4  | 7  | 3  | 5  | 3  | 3  |    | 4  |    |    |    |    |    |    |    |    | 61    |

Figure S1: Frequency of samples by dog breed and age. Only breeds that contributed >60 samples are included. Darker cells represent higher frequencies.

*E. coli*

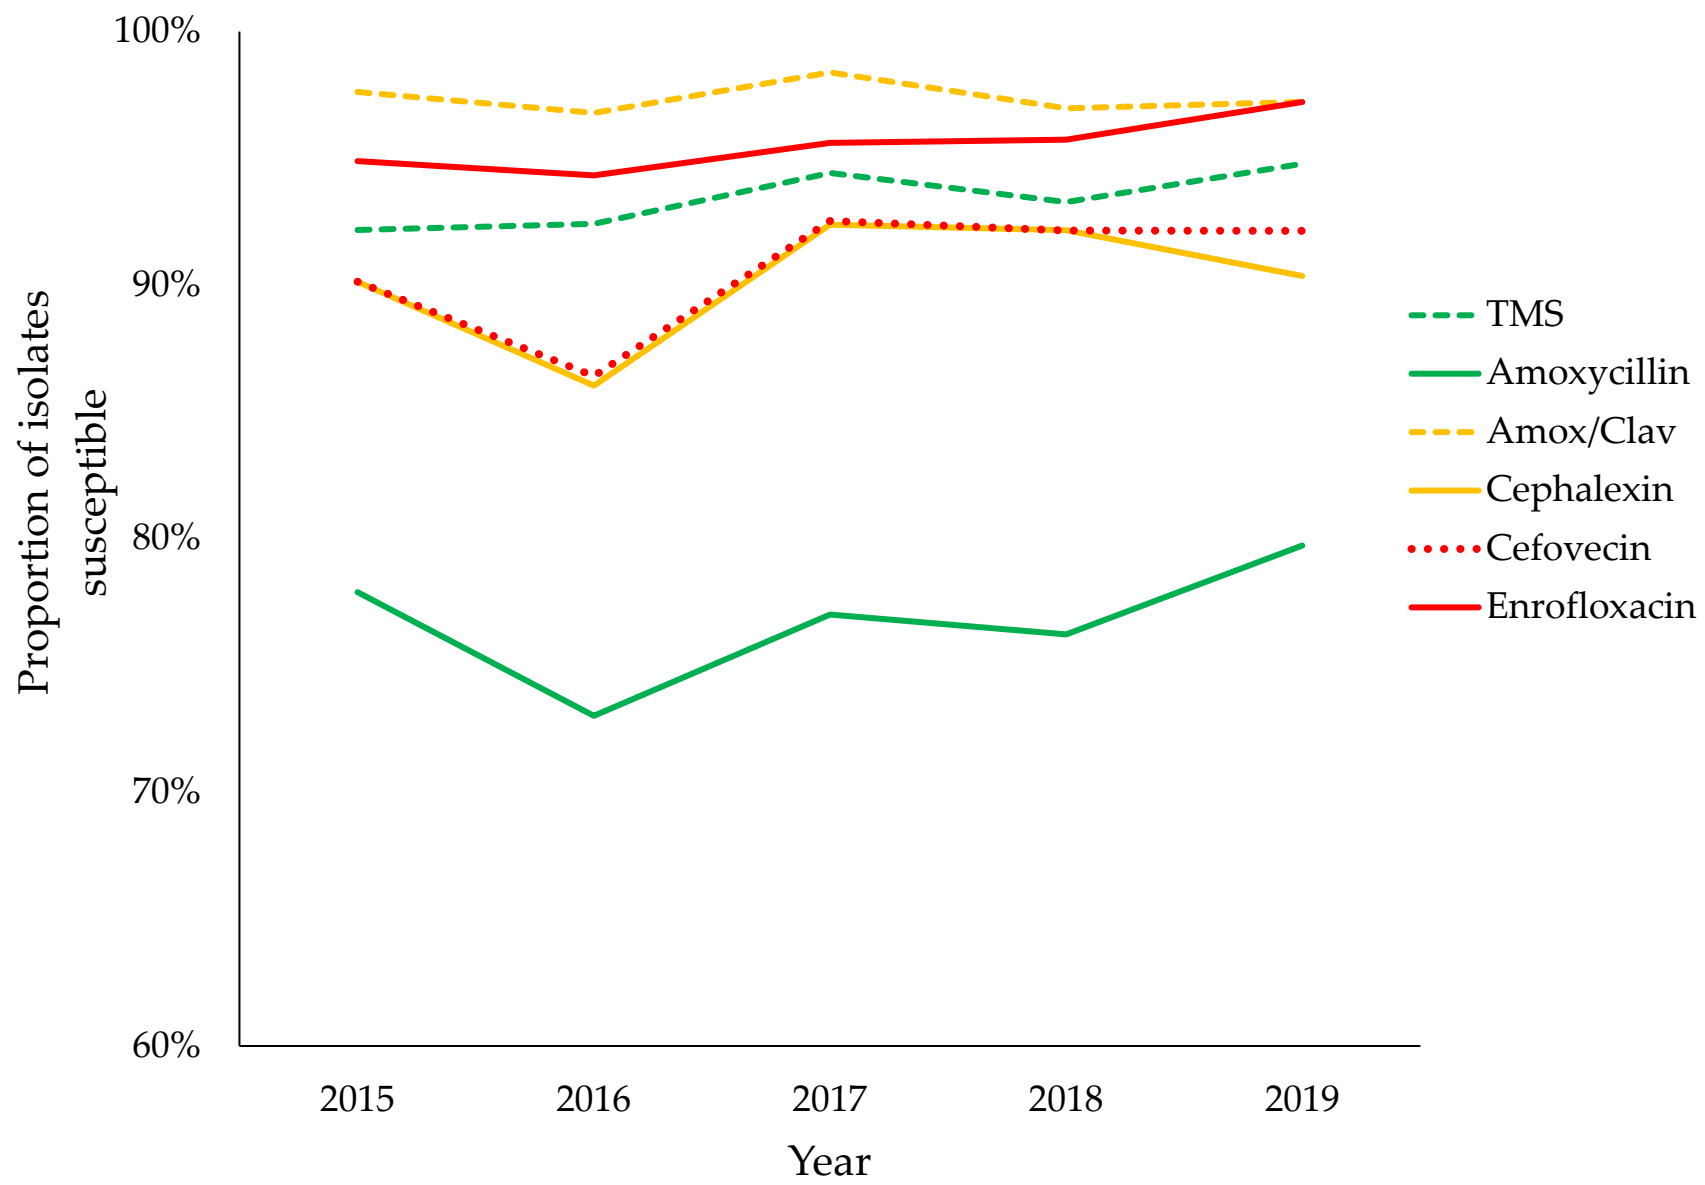

(a)

*E.faecalis*

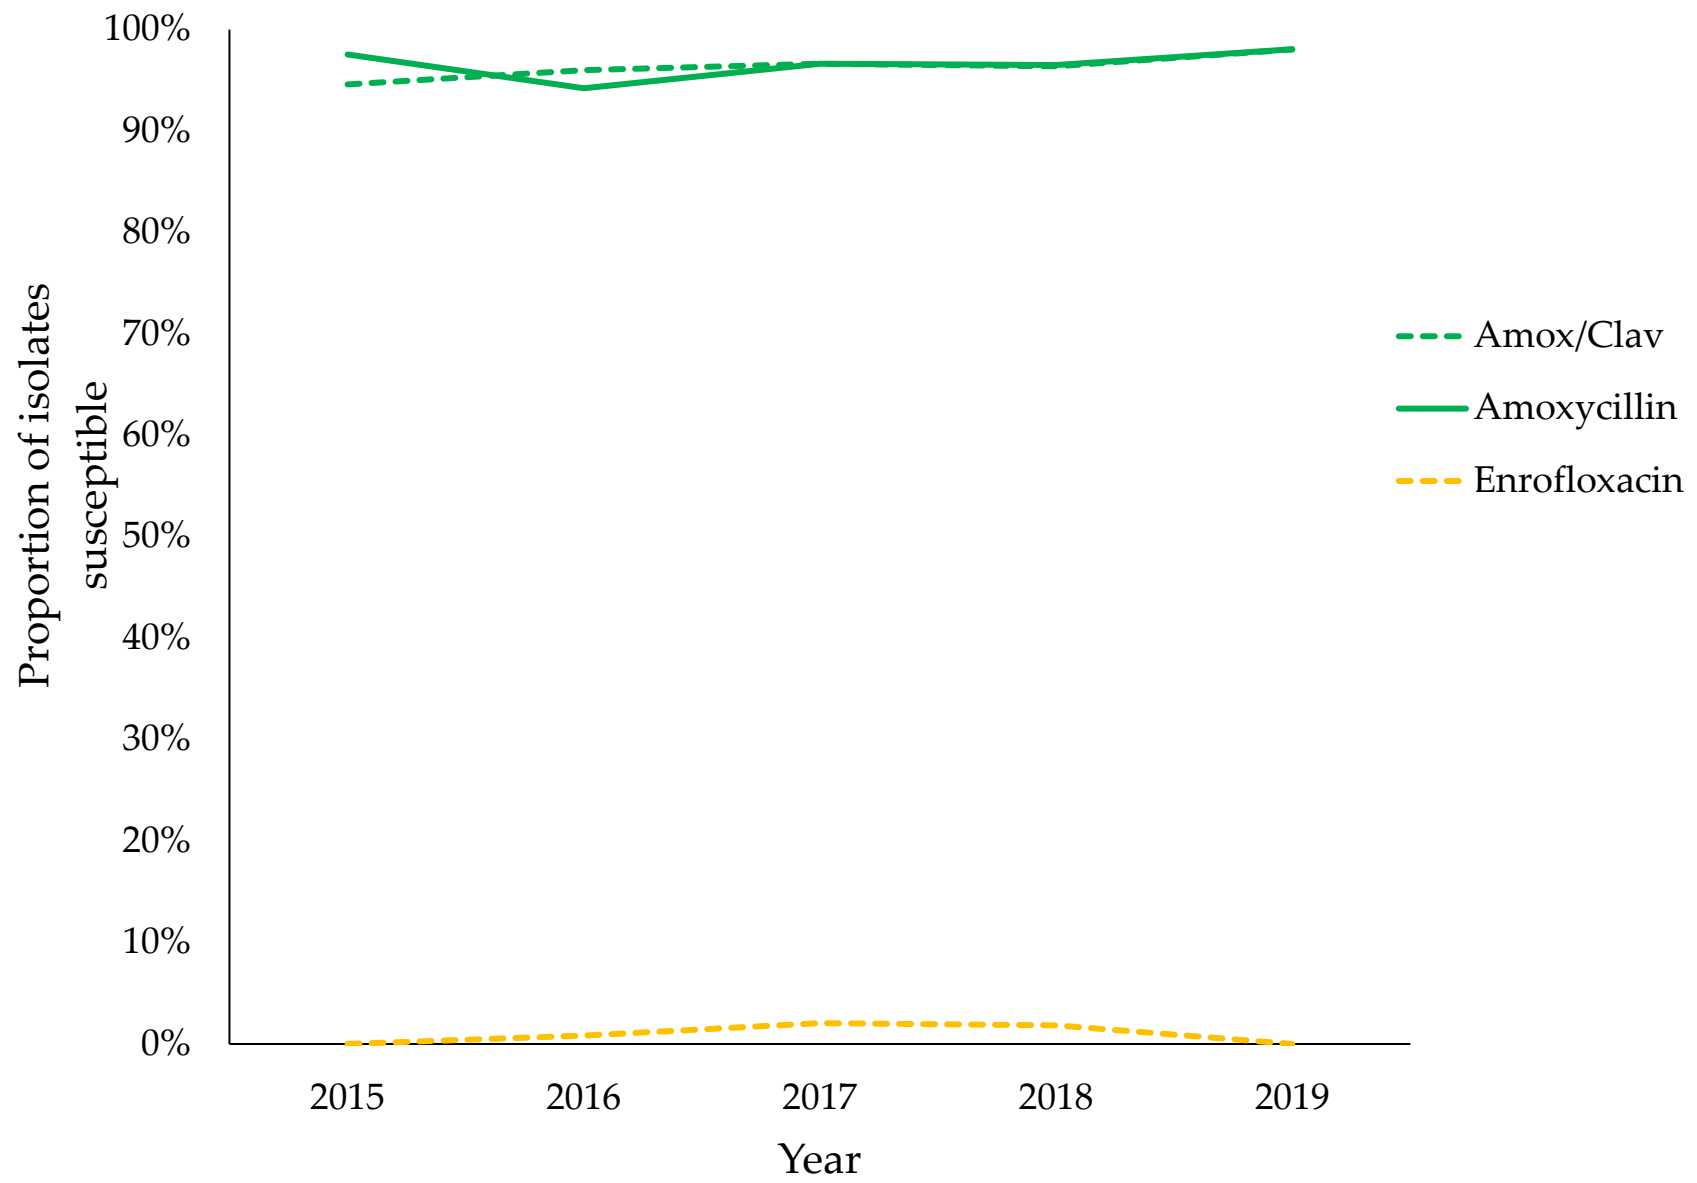

(b)

*S.pseudintermedius*

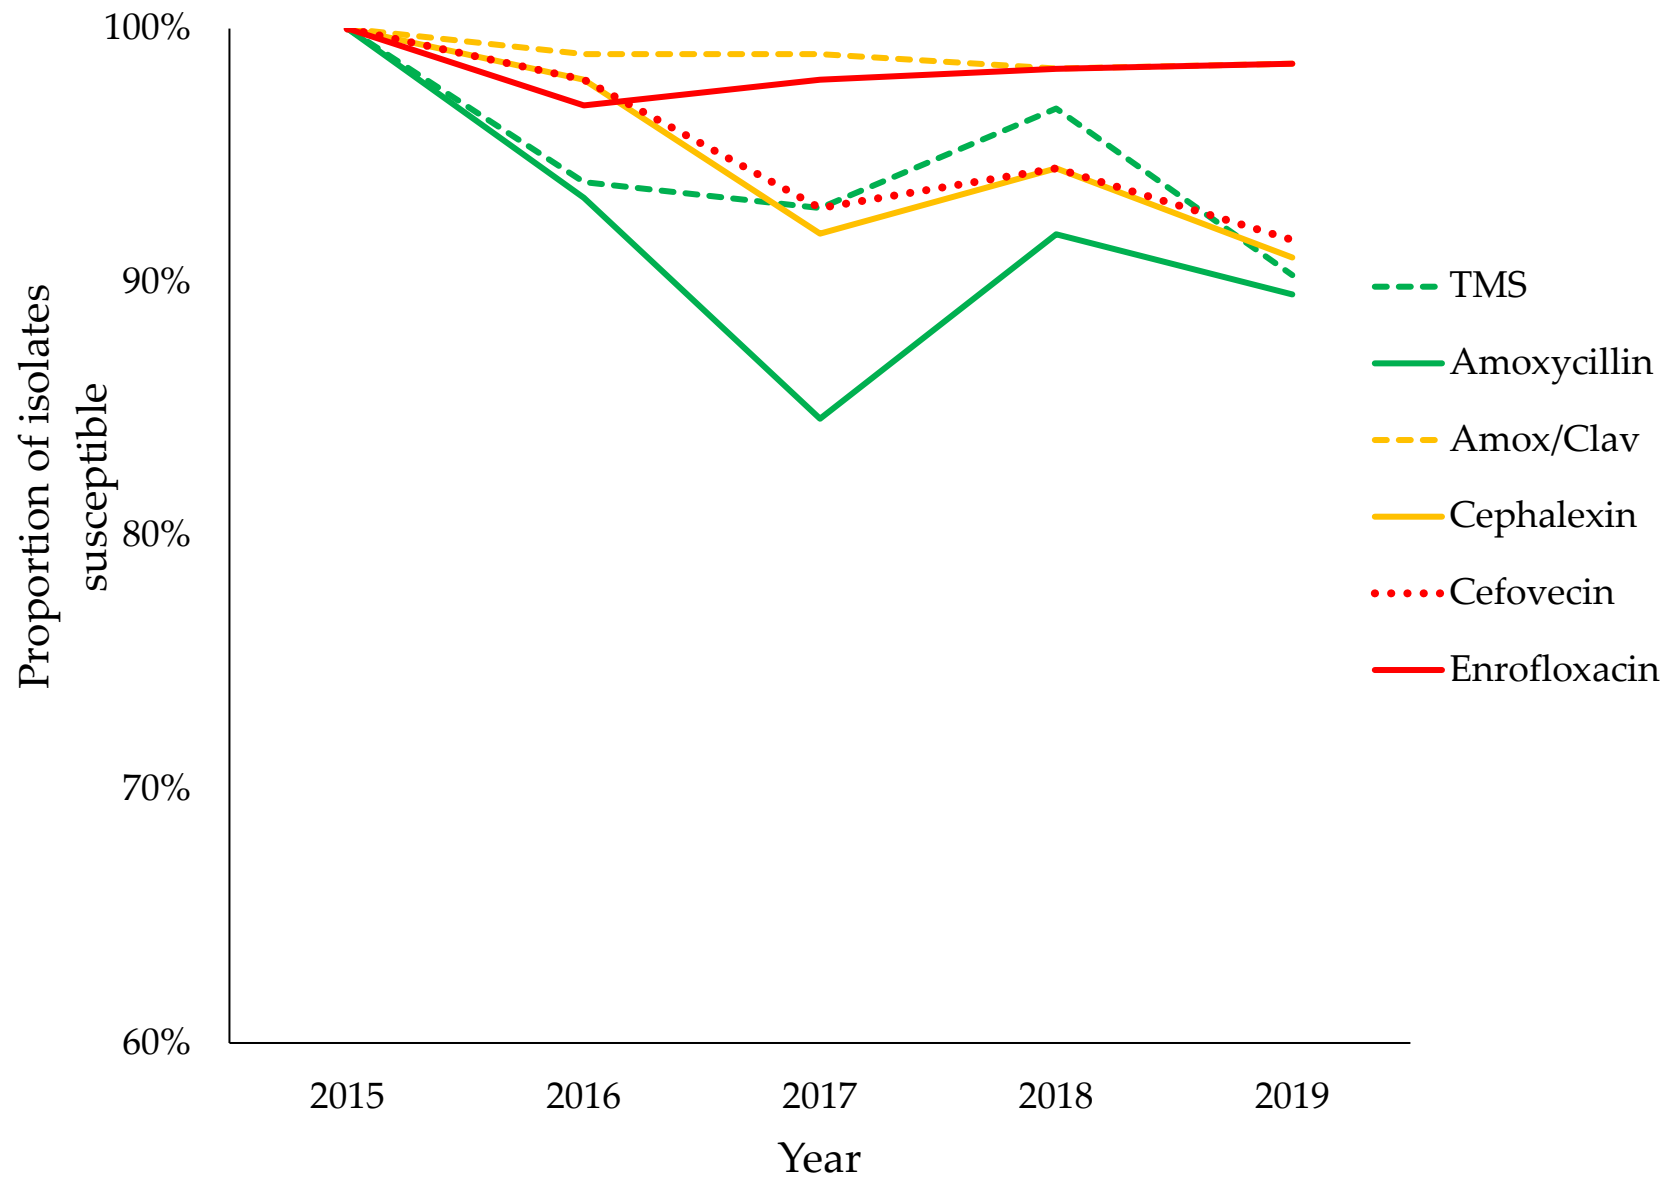

*Proteus mirabilis*

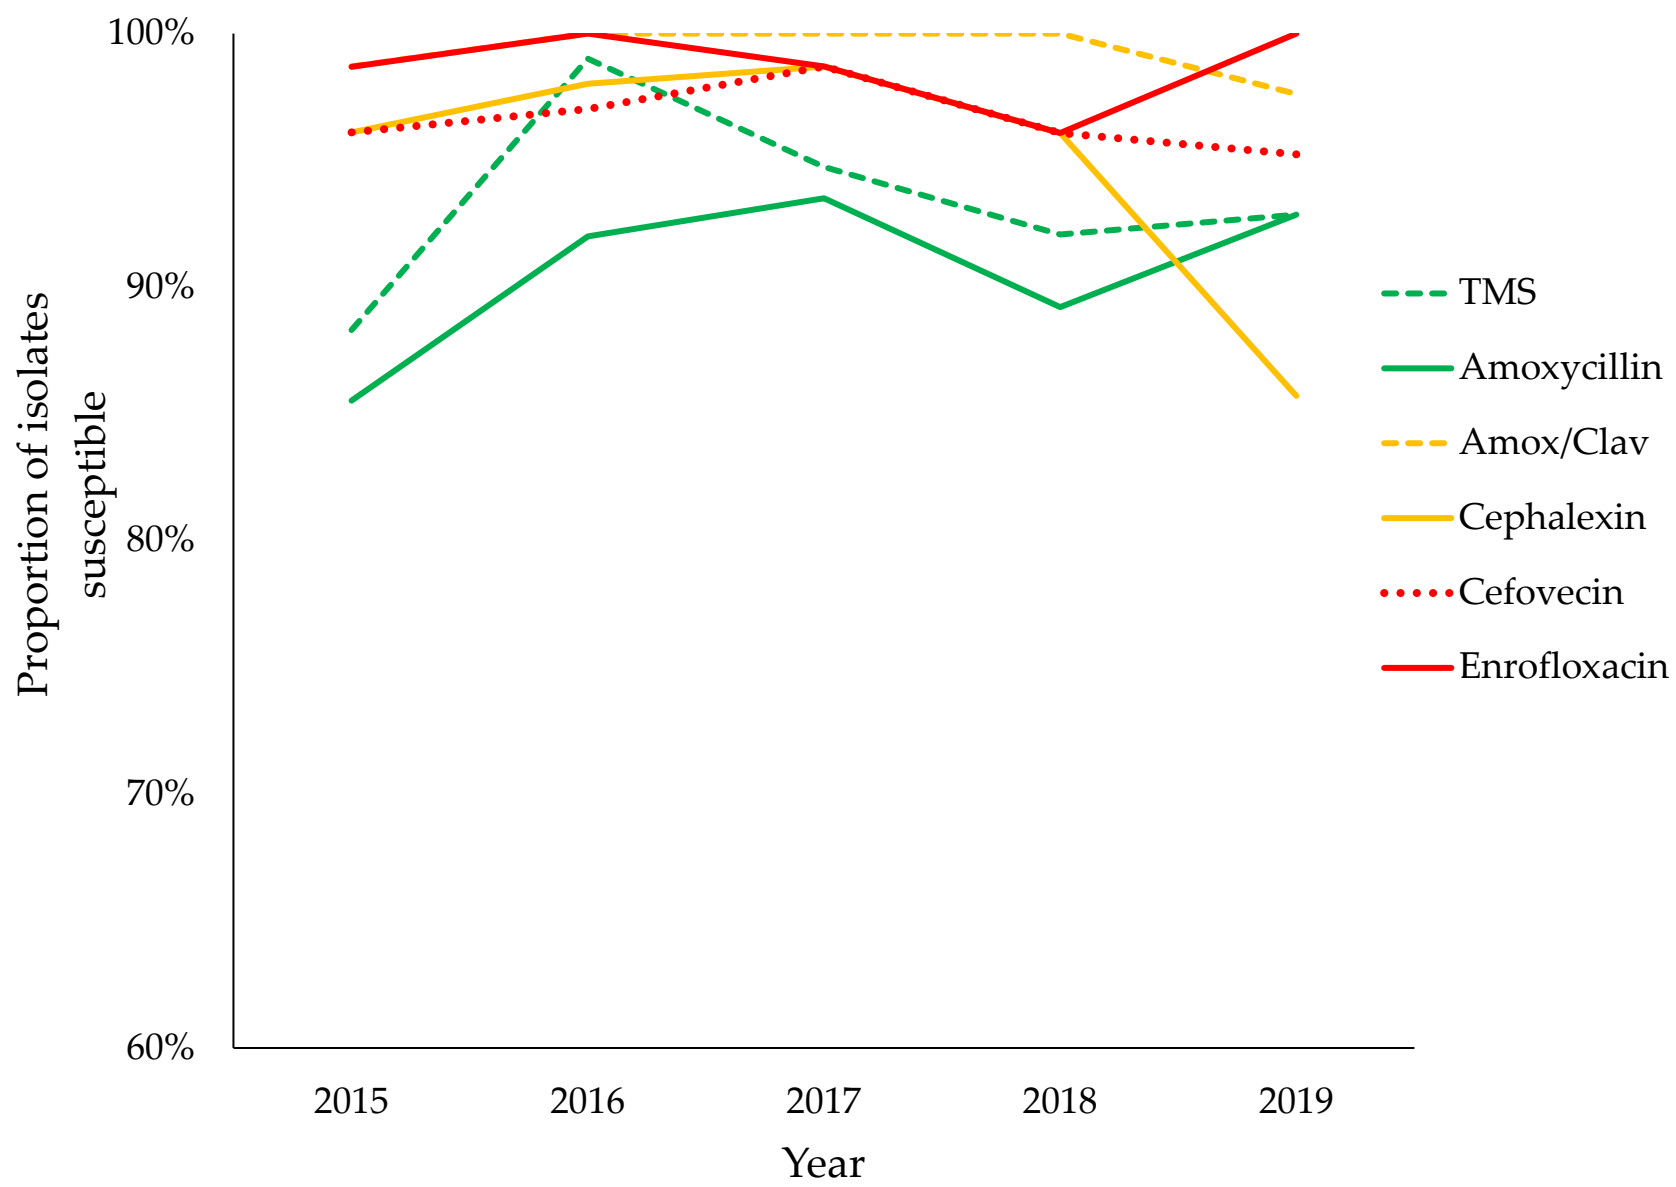

(d)

*Proteus* spp.

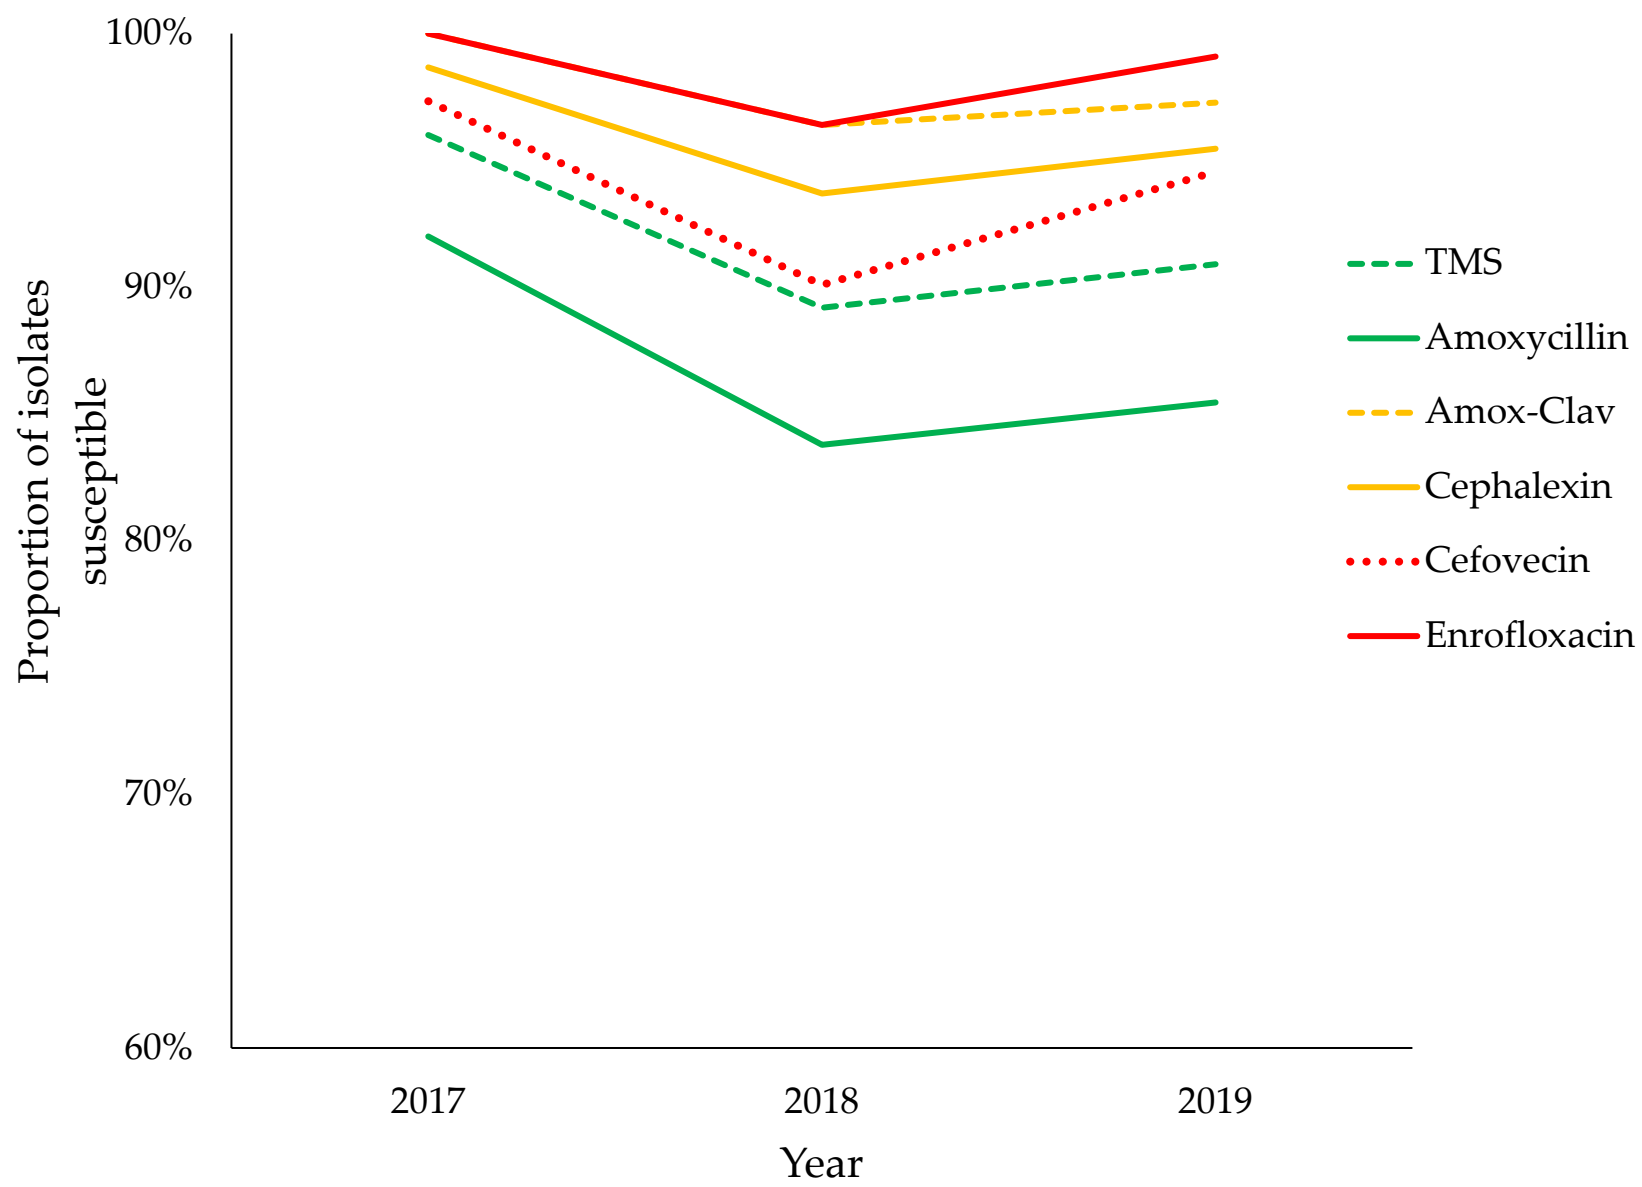

*Enterobacter* spp.

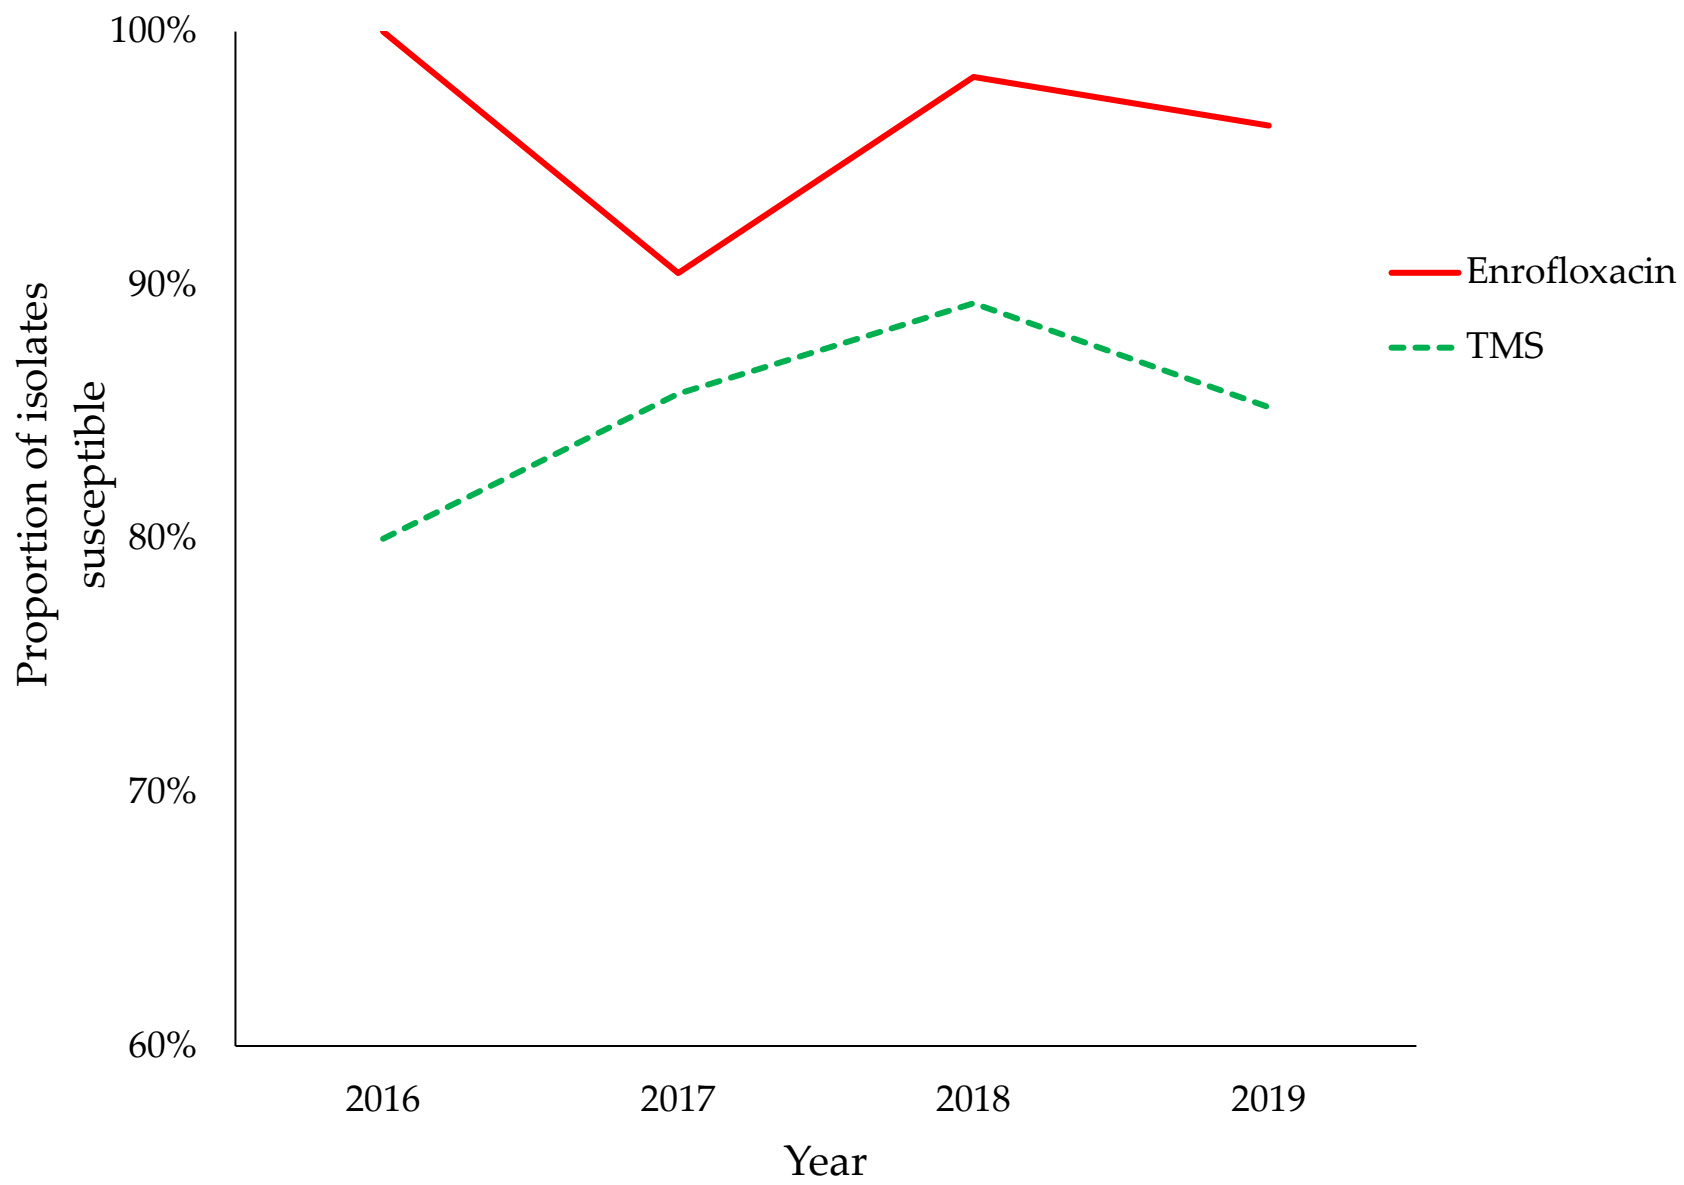

**Figure S2 a-f:** Changes in susceptibility over time for the most common species/genera. a) *E.coli*; b) *Enterococcus faecalis*; c) *Staphylococcus pseudintermedius*; d) *Proteus mirabilis*; e) *Proteus* spp. (not otherwise specified); f) *Enterobacter* spp. Amox-Clav = amoxicillin clavulanate; TMS = trimethoprim-sulfonamide. Chart colors represent local antimicrobial importance ratings, red for high importance, yellow for medium importance, green for low importance. Intrinsic resistance and drugs that were tested on fewer than 30 isolates of the species/genus are not included.
